# Supplementary material for: Serendipitous discovery of a novel polymorph of an immunosuppressant drug azathioprine: phase transformation, solubility, dissolution and stability study
Source: Royal Society of Chemistry journal article supplement (doi:10.1039/d4ce00589a), 2024-01-01
Supplement: d4ce00589a1.pdf [file d4ce00589a1.pdf]

## Serendipitous discovery of a novel polymorph of an immunosuppressant drug azathioprine: Phase transformation, solubility, dissolution and stability study

Likhitha Kalavalapudi<sup>a</sup>, Sivanarayanan Palani<sup>a,b</sup>, and Sunil Kumar Nechipadappu<sup>a</sup> Centre for X-ray Crystallography, Department of Analytical & Structural Chemistry, CSIR-Indian Institute of Chemical Technology, Hyderabad, 500007, India

<sup>b</sup> Academy of Scientific and Innovative Research (AcSIR), Ghaziabad, 201002, India

\*Corresponding author: nsunilkumar@iiict.res.in

### Table of Contents

| S. No | Figure/Table No  | Figure/Table captions                                                        | Page no |
|-------|------------------|------------------------------------------------------------------------------|---------|
| 1     | Table S1         | Hydrogen-bond geometries AZP forms                                           | 2       |
| 2     | <b>Table S2</b>  | Experimental details of AZP F-III bulk scale preparation trials              | 2-4     |
| 3     | <b>Table S3</b>  | Percentage of F-I and F-III after 7, 14 and 30 days of exposure to 70-75% RH | 4-5     |
| 4     | <b>Table S4</b>  | Percentage of F-I and F-III after 7, 14 and 30 days of exposure to 90-95% RH | 5       |
| 5     | <b>Figure S1</b> | <sup>1</sup> H NMR spectrum of Form-I and Firm-III                           | 5       |
| 6     | <b>Figure S2</b> | FT-IR spectrum overlay of F-I and F-III                                      | 6       |
| 7     | <b>Figure S3</b> | Standard linearity plot of AZP                                               | 6       |
| 8     | <b>Figure S4</b> | The TGA plot of AZP F-I and F-III                                            | 7       |
| 9     | <b>Figure S5</b> | Synthon interaction energy in F-I and F-III                                  | 7       |
| 10    | <b>Figure S6</b> | The 2D fingerprint plots showing N-H/H-N, C-H/H-C and O-H/H-O interactions   | 8       |
| 11    | <b>Figure S7</b> | All interactions of AZP F-I                                                  | 8       |
| 12    | <b>Figure S8</b> | All interactions of AZP F-III                                                | 8       |

**Table S1** Hydrogen-bond geometries AZP forms.

| <b>AZP Form-III</b>                                                                                                                               |          |                  |                  |                             |
|---------------------------------------------------------------------------------------------------------------------------------------------------|----------|------------------|------------------|-----------------------------|
| D—H $\cdots$ A                                                                                                                                    | D—H (Å)  | H $\cdots$ A (Å) | D $\cdots$ A (Å) | $\angle$ D—H $\cdots$ A (°) |
| C1—H1 $\cdots$ N6 <sup>i</sup>                                                                                                                    | 0.93     | 2.48             | 3.401 (2)        | 174                         |
| C5—H5 $\cdots$ O2 <sup>ii</sup>                                                                                                                   | 0.93     | 2.33             | 3.172 (2)        | 150                         |
| N2—H2N $\cdots$ N3 <sup>iii</sup>                                                                                                                 | 0.88 (2) | 2.05 (2)         | 2.915 (2)        | 167 (2)                     |
| Symmetry codes: (i) $x-1, -y+3/2, z-1/2$ ; (ii) $-x+2, y-1/2, -z+1/2$ ; (iii) $-x+1, -y+1, -z$ .                                                  |          |                  |                  |                             |
| <b>AZP-H2O</b>                                                                                                                                    |          |                  |                  |                             |
| N2A—H1N $\cdots$ N3A <sup>i</sup>                                                                                                                 | 0.89 (2) | 2.06 (2)         | 2.919 (5)        | 164 (5)                     |
| N1B—H2N $\cdots$ N3B <sup>ii</sup>                                                                                                                | 0.89 (2) | 2.03 (2)         | 2.918 (5)        | 173 (3)                     |
| Symmetry codes: (i) $-x+1, -y+2, -z+1$ ; (ii) $-x+1, -y+1, -z+1$ .                                                                                |          |                  |                  |                             |
| <b>AZP-MEE</b>                                                                                                                                    |          |                  |                  |                             |
| N2A—H1N $\cdots$ N3A <sup>i</sup>                                                                                                                 | 0.94 (2) | 1.98 (3)         | 2.867 (4)        | 157 (4)                     |
| O1W—H2W $\cdots$ O1 <sup>ii</sup>                                                                                                                 | 0.93 (2) | 2.49 (4)         | 3.204 (5)        | 134 (4)                     |
| O1W—H2W $\cdots$ O2 <sup>ii</sup>                                                                                                                 | 0.93 (2) | 2.05 (3)         | 2.881 (5)        | 147 (5)                     |
| N2B—H2N $\cdots$ N3B <sup>iii</sup>                                                                                                               | 0.88 (2) | 2.04 (2)         | 2.916 (4)        | 177 (3)                     |
| O2—H2O $\cdots$ N1B                                                                                                                               | 0.88 (2) | 2.01 (2)         | 2.876 (4)        | 168 (6)                     |
| O1W—H1W $\cdots$ O1                                                                                                                               | 0.91 (2) | 1.91 (3)         | 2.777 (5)        | 160 (6)                     |
| C5A—H5A $\cdots$ O2B                                                                                                                              | 0.95     | 2.49             | 3.337 (5)        | 149                         |
| Symmetry codes: (i) $-x-2, -y+1, -z+2$ ; (ii) $x+1, y, z$ ; (iii) $-x, -y+1, -z+1$ .                                                              |          |                  |                  |                             |
| <b>AZP-DOX</b>                                                                                                                                    |          |                  |                  |                             |
| C1—H1 $\cdots$ N6 <sup>i</sup>                                                                                                                    | 0.95     | 2.39             | 3.325 (3)        | 170                         |
| C4—H4 $\cdots$ O2 <sup>ii</sup>                                                                                                                   | 0.95     | 2.40             | 3.293 (3)        | 156                         |
| C7—H7A $\cdots$ O3 <sup>iii</sup>                                                                                                                 | 0.98     | 2.66             | 3.636 (3)        | 177                         |
| C7—H7B $\cdots$ N4 <sup>iii</sup>                                                                                                                 | 0.98     | 2.46             | 3.389 (4)        | 158                         |
| C7—H7C $\cdots$ O1 <sup>iv</sup>                                                                                                                  | 0.98     | 2.60             | 3.542 (3)        | 162                         |
| C8—H8 $\cdots$ O3                                                                                                                                 | 0.95     | 2.50             | 3.260 (4)        | 137                         |
| N2—H2 $\cdots$ N3 <sup>v</sup>                                                                                                                    | 0.86 (3) | 2.05 (3)         | 2.892 (3)        | 164 (3)                     |
| Symmetry codes: (i) $x-1, -y+3/2, z+1/2$ ; (ii) $-x+2, y-1/2, -z+1/2$ ; (iii) $x-1, y, z$ ; (iv) $-x+1, y-1/2, -z+1/2$ ; (v) $-x+1, -y+1, -z+1$ . |          |                  |                  |                             |

**Table S2** Experimental details of AZP F-III bulk scale preparation trials.

| S.no | Method           | Temperature and stirring time                                     | Solvents                               | Remarks based on PXRD analysis |
|------|------------------|-------------------------------------------------------------------|----------------------------------------|--------------------------------|
| 1.   | Ball mill method | Liquid-assisted grinding using Ball-mill for 2 hrs with 1000 rpm. | 2 drops of acetone                     | Form I                         |
| 2.   | Ball mill method | Liquid-assisted grinding using Ball-mill for 2 hrs with 1000 rpm. | 2 drops of cyclohexanol.               | Form I                         |
| 3.   | Slurry method    | Stirred at 100°C, 400rpm for 48 hrs.                              | Cyclohexanol and Toluene in 1:1 ratio. | AZP form I.                    |
| 4.   | Slurry method    | Reflux at 100°C for 24 hrs.                                       | 1:2 mixture of cyclohexanol and        | AZP form I.                    |

|     |                          |                                                                                                                                                                                                                    |                                                                                     |                                          |
|-----|--------------------------|--------------------------------------------------------------------------------------------------------------------------------------------------------------------------------------------------------------------|-------------------------------------------------------------------------------------|------------------------------------------|
|     |                          |                                                                                                                                                                                                                    | acetone.                                                                            |                                          |
| 5.  | Slurry method            | Reflux at 100°C for 24 hrs.                                                                                                                                                                                        | 1:1 mixture of cyclohexanol and acetonitrile.                                       | AZP form I.                              |
| 6.  | Slurry method            | Stirred at 100°C, 400rpm for 48 hrs.                                                                                                                                                                               | Cyclohexanol and Toluene in 1:2 ratio.                                              | AZP form I.                              |
| 7.  | Slurry method            | Stirred at RT for 21 hrs.                                                                                                                                                                                          | Acetone                                                                             | AZP form I.                              |
| 8.  | Slurry method            | Stirred at room temperature for 72 hours.                                                                                                                                                                          | 6 drops of lactic acid, and 1:1 ratio of 1-propanol and 2-butanol.                  | AZP form I.                              |
| 9.  | Slurry method            | Stirred at 80°C for 24 hrs.                                                                                                                                                                                        | Malic acid (2 mol equivalent) and 1ml of cyclohexanol                               | AZP form I.                              |
| 10. | Slurry method            | Reflux at 100°C for 24 hrs.                                                                                                                                                                                        | 5% Cyclohexanol in Isopropyl alcohol.                                               | Form I with less percentage of Form III. |
| 11. | Solvent evaporation      | Reflux at 100-150°C until clear solution obtained.                                                                                                                                                                 | Cyclohexanol and Acetone in 1:7 ratio.                                              | Form I                                   |
| 12. | Slurry method            | Stirred at room temperature for 96 hours.                                                                                                                                                                          | 5% Cyclohexanol in Isopropyl alcohol.                                               | AZP form I.                              |
| 13. | Slurry method            | Stirred at room temperature for 96 hours.                                                                                                                                                                          | 5% Cyclohexanol in acetone.                                                         | AZP form I.                              |
| 14. | Slurry method            | Stirred at room temperature for 96 hours.                                                                                                                                                                          | Toluene and Acetone in 1:1 ratio                                                    | AZP form I.                              |
| 15. | Recrystallization method | Reflux at 100-110°C for 1 hour until clear solution obtained. The obtained clear solution was stirred at room temperature for 72 hours, that resulted in precipitate which was filtered and dried in oven at 40°C. | 10% cyclohexanol in Acetone.                                                        | AZP form I.                              |
| 16. | Solvent evaporation      | Stirred at 104°C until clear solution obtained.                                                                                                                                                                    | 1-propanol (1.5ml), 2-butanol(1.5ml) and lactic acid (3 drops, 19.64mol equivalent) | <b>Phase pure Form III crystals.</b>     |
| 17. | Slurry method            | Stirred at room temperature for 24 hrs.                                                                                                                                                                            | 1-propanol and 2-butanol in 1:1 ratio.                                              | AZP form I.                              |
| 18. | Recrystallization        | Reflux at 110°C for 2-3 hrs until clear solution was obtained. The obtained solution was stirred at room temperature for 21 hours                                                                                  | 1-propanol and 2-butanol in 1:1 ratio.                                              | <b>Form III.</b>                         |

|     |                   |                                                                                                                                                                                                                             |                                                                 |                                  |
|-----|-------------------|-----------------------------------------------------------------------------------------------------------------------------------------------------------------------------------------------------------------------------|-----------------------------------------------------------------|----------------------------------|
|     |                   | that resulted in precipitate, which was filtered and dried at 40°C.                                                                                                                                                         |                                                                 |                                  |
| 19. | Slurry method     | Stirred at room temperature for 72 hrs.                                                                                                                                                                                     | 13% lactic acid in 1:1 mixture of 1-propanol and 2-butanol.     | Form I.                          |
| 20. | Slurry method     | Stirred at room temperature for 72 hrs.                                                                                                                                                                                     | 13% lactic acid in 1-propanol.                                  | Form I.                          |
| 21. | Recrystallization | Reflux at 110°C for 1 hr, at 150°C for 1hr until clear solution was obtained. The obtained solution was stirred at room temperature for 21 hours that resulted in precipitate, which was filtered and dried at 40°C.        | 10% lactic acid in 1:1 mixture of 1-propanol and 2-butanol.     | <b>Form III.</b>                 |
| 22. | Recrystallization | Reflux at 150°C for 1 hour until clear solution was obtained, which was stirred in ice bath for 45 minutes, followed by room temperature stirring for 21 hours.                                                             | 11% lactic acid in 1:1 mixture of 1-propanol and 2-butanol.     | Concomitant form I and form III. |
| 23. | Recrystallization | Reflux at 150°C for 1 hour and 110°C for 1 hour, until clear solution was obtained, which was stirred at room temperature for 3 hours. The obtained precipitate at room temperature was filtered and dried in oven at 40°C. | 6.3% of lactic acid in 1:1 mixture of 1-propanol and 2-butanol. | <b>Form III.</b><br>Yield : 52%  |

**Table S3** Percentage of F-I and F-III after 7, 14 and 30 days of exposure to 70-75% RH condition.

| S. No | Solid forms         | % of F-I and F-III by Rietveld refinement |
|-------|---------------------|-------------------------------------------|
| 1.    | F-III After 7 days  | 100% F-III                                |
| 2.    | F-III After 14 days | 98.57% F-III and 1.43% F-I                |
| 3.    | F-III After 30 days | 95.95% F-III and 4.05% F-I                |

|    |                   |          |
|----|-------------------|----------|
| 4. | F-I After 7 days  | 100% F-I |
| 5. | F-I After 14 days | 100% F-I |
| 6. | F-I After 30 days | 100% F-I |

**Table S4** Percentage of F-I and F-III after 7, 14 and 30 days of exposure to 90-95% RH condition.

| S. No | Solid forms         | % of F-I and F-III by Rietveld refinement |
|-------|---------------------|-------------------------------------------|
| 1.    | F-III After 7 days  | 94.78% F-III and 5.22% F-I                |
| 2.    | F-III After 14 days | 42.92% F-III and 57.08% F-I               |
| 3.    | F-III After 30 days | 100% F-I                                  |
| 4.    | F-I After 7 days    | 100% F-I                                  |
| 5.    | F-I After 14 days   | 100% F-I                                  |
| 6.    | F-I After 30 days   | 100% F-I                                  |

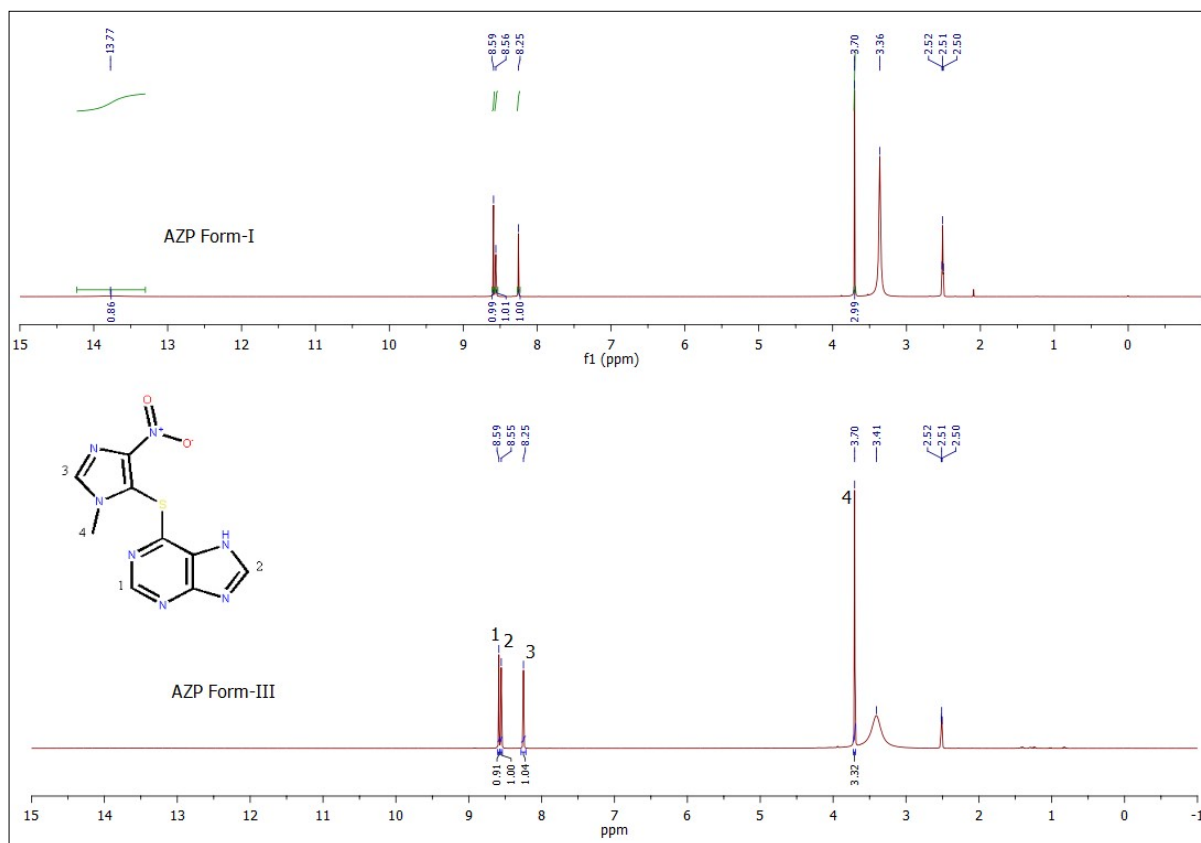

**Figure S1**  $^1\text{H}$  NMR spectrum of Form-I and Firm-III.

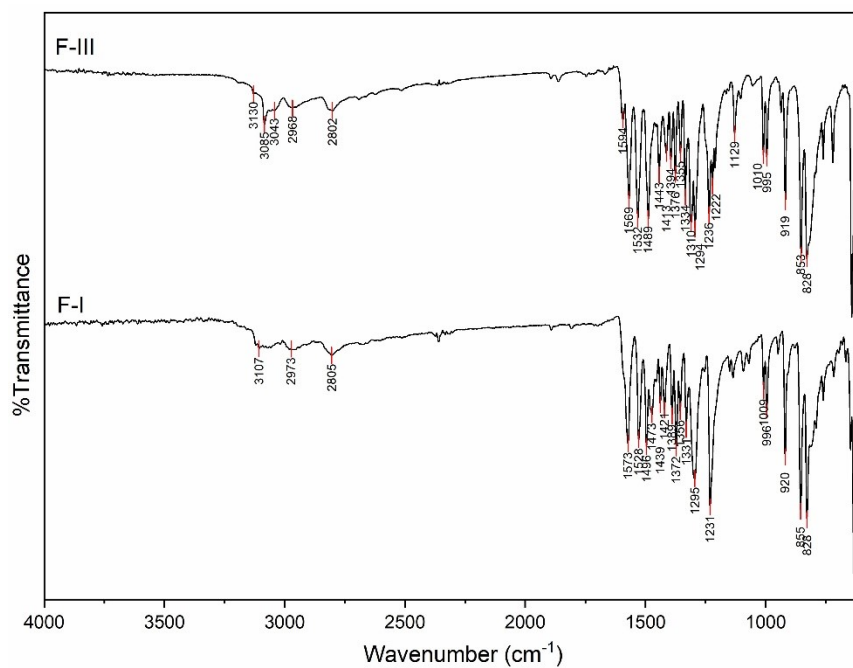

**Figure S2** FT-IR spectrum overlay of F-I and F-III.

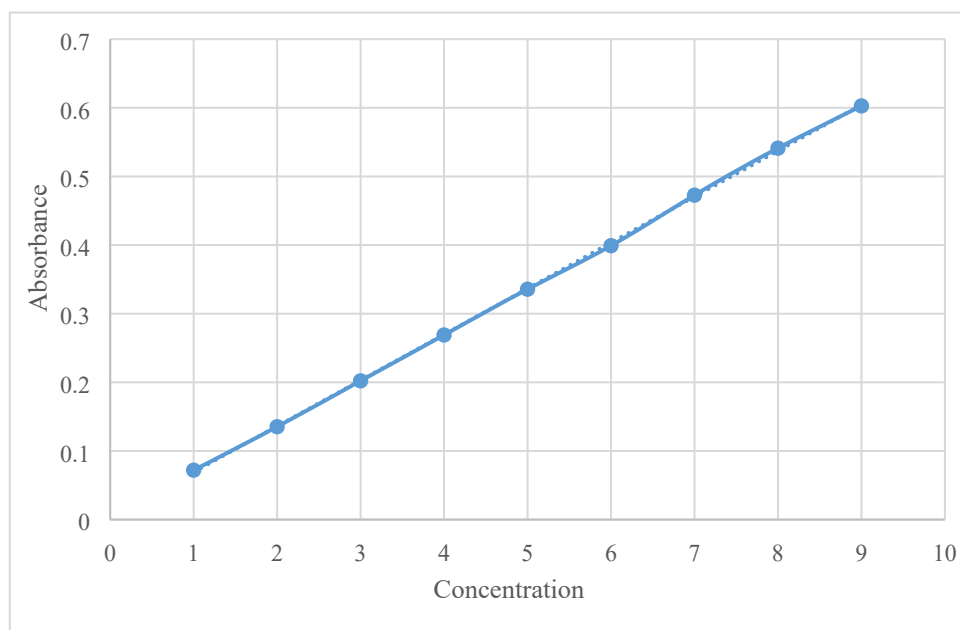

**Figure S3** Standard linearity plot of AZP.

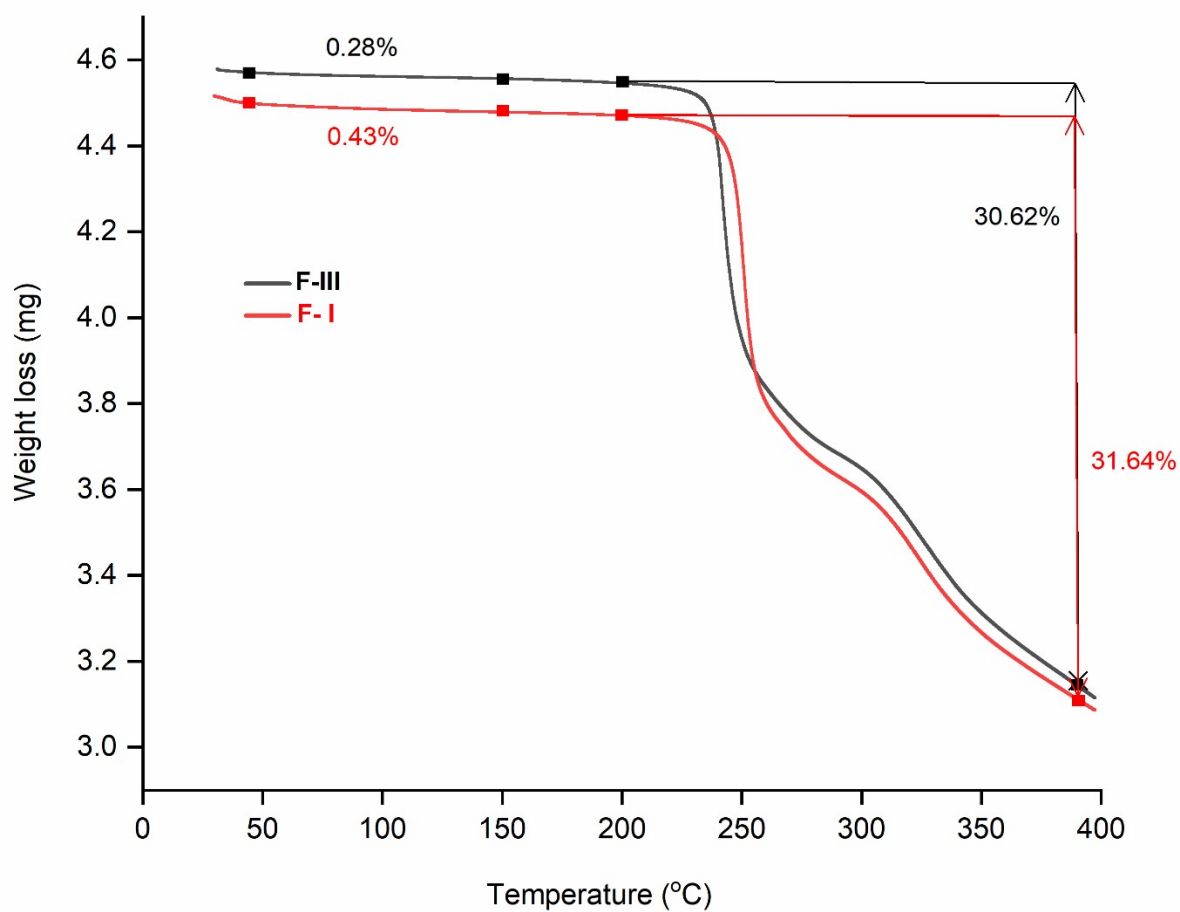

**Figure S4** The TGA plot of AZP F-I and F-III.

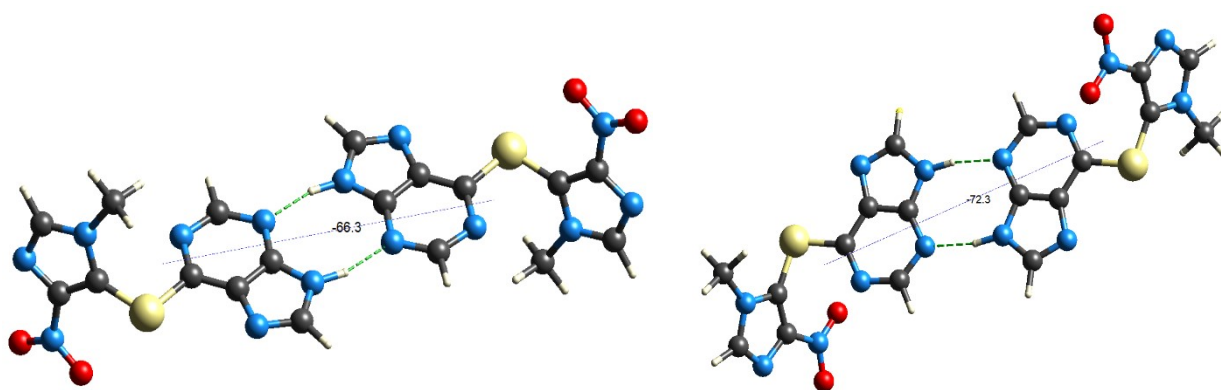

**Figure S5** Synthon interaction energy in F-I and F-III.

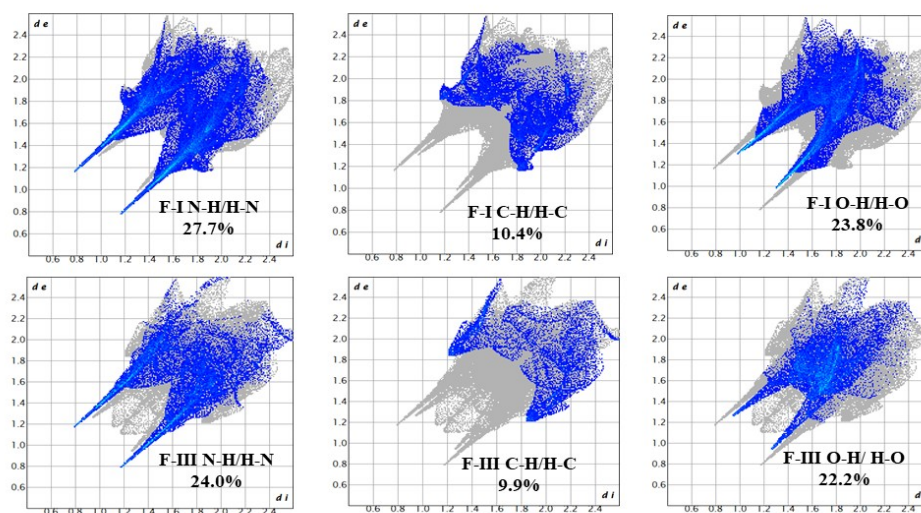

**Figure S6** The 2D fingerprint plots showing N-H/H-N, C-H/H-C and O-H/H-O interactions in F-I and F-III forms.

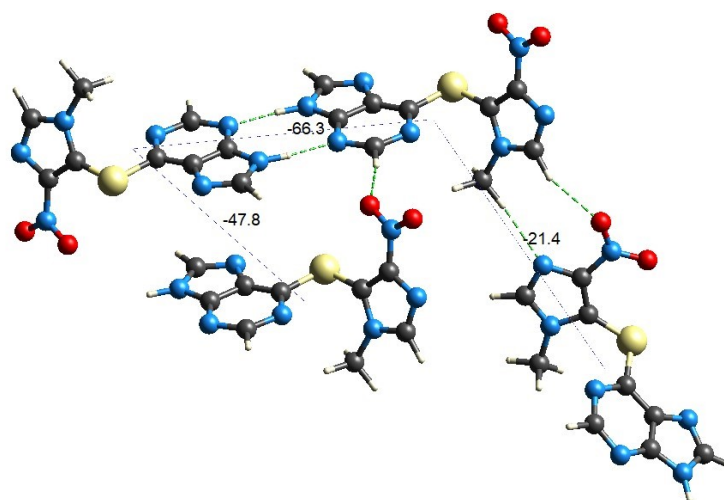

**Figure S7** All interactions of AZP F-I.

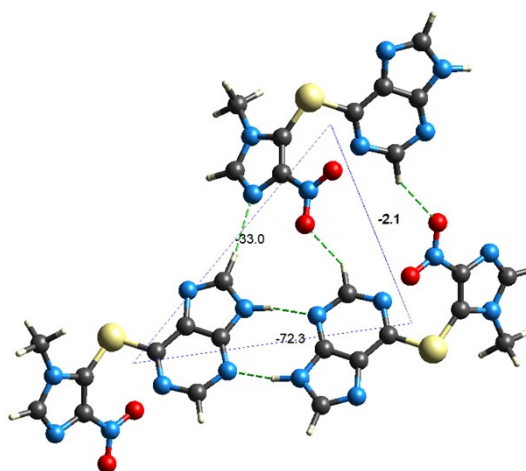

**Figure S8** All interactions of AZP F-III.
